# Supplementary material for: Liquid-phase photo-induced covalent modification (PICM) of single-layer graphene by short-chain fatty acids
Source: Royal Society of Chemistry journal article supplement (doi:10.1039/d2nr06698j), 2023-01-01
Supplement: d2nr06698j1.pdf [file d2nr06698j1.pdf]

## Supporting information for

# Liquid-Phase Photo-induced Covalent Modification (PICM) of Single-Layer Graphene by Short-Chain Fatty Acids

*Guilin Feng,<sup>a</sup> Tomoko Inose,<sup>b</sup> Nozomu Suzuki,<sup>c</sup> Han Wen,<sup>a</sup> Farsai Taemaitree,<sup>a,d</sup> Mathias Wolf,<sup>e</sup>  
Shuichi Toyouchi,<sup>e,f</sup> Yasuhiko Fujita,<sup>g</sup> Kenji Hirai,<sup>\*a</sup> and Hiroshi Uji-i<sup>\*a,b,e</sup>*

*<sup>a</sup> Research Institute for Electronic Science (RIES) and Division of Information Science and  
Technology, Graduate School of Information Science and Technology, Hokkaido University,  
N20W10, Sapporo, Hokkaido 001-0020, Japan.*

*<sup>b</sup> Institute for Integrated Cell-Material Science (WPI-iCeMS), Kyoto University, Yoshida, Sakyo-  
ku, Kyoto 606-8501, Japan.*

*<sup>c</sup> Department of Human Studies, Faculty of Arts and Humanities, Shikoku Gakuin University, 3-  
2-1 Bunkyo-cho, Zentsuji, Kagawa 765-8505, Japan.*

*<sup>d</sup> Department of Chemistry, Division of Molecular Imaging and Photonics, KU Leuven,  
Celestijnenlaan 200F, B-3001 Leuven, Belgium.*

*<sup>e</sup> Department of Applied Chemistry, National Chiao Tung University, Hsinchu 30010, Taiwan*

*<sup>f</sup> Toray Research Center, Inc., Sonoyama 3-3-7, Otsu 520-8567, Shiga, Japan.*

*Corresponding authors:*

*E-mail: [hirai@es.hokudai.ac.jp](mailto:hirai@es.hokudai.ac.jp), [hiroshi.ujii@es.hokudai.ac.jp](mailto:hiroshi.ujii@es.hokudai.ac.jp)*

**KEYWORDS:** graphene; photochemical reaction; Raman spectroscopy; short-chain fatty acids (SCFAs)

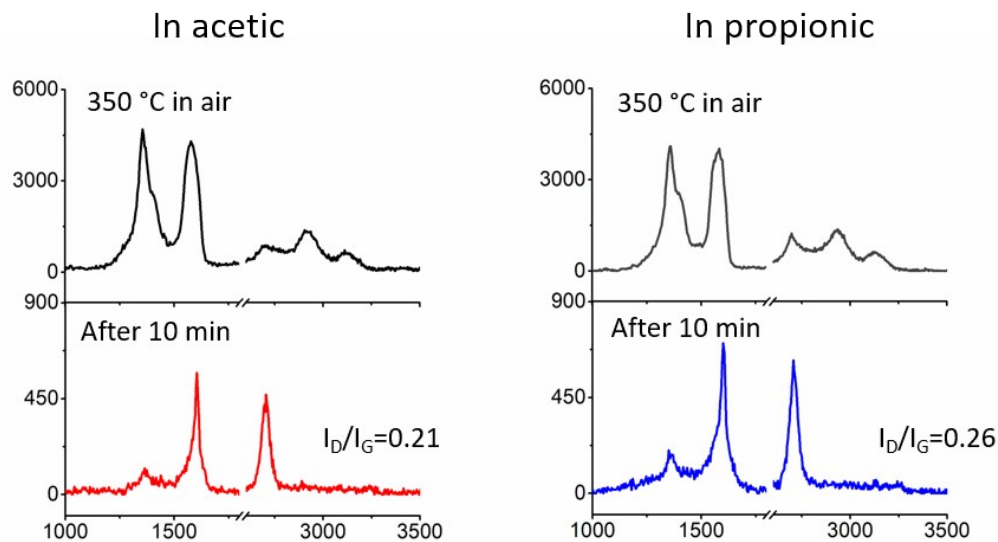

**Fig. S1** Thermal treatment of graphene after PICM in acetic and propionic acids solutions, respectively.

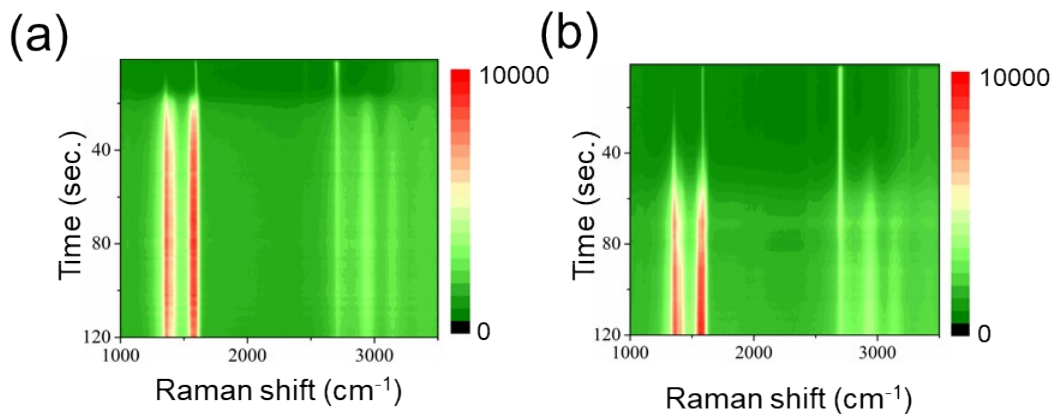

**Fig. S2.** A typical in-situ Raman spectroscopy during the PICMs of graphene monolayers in aqueous solution (0.1 M) of propionic acid (a) and butyric acid (b), respectively.

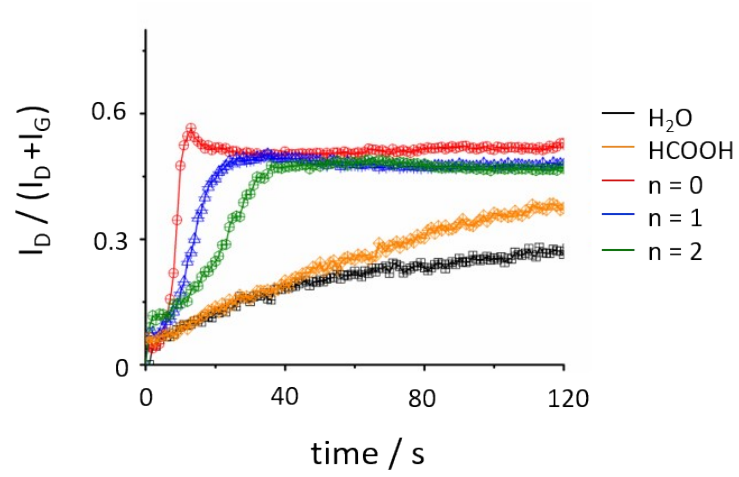

**Fig. S3** The intensity ratio between D and (D+G) bands ( $I_D/(I_D+I_G)$ ) as a function of time

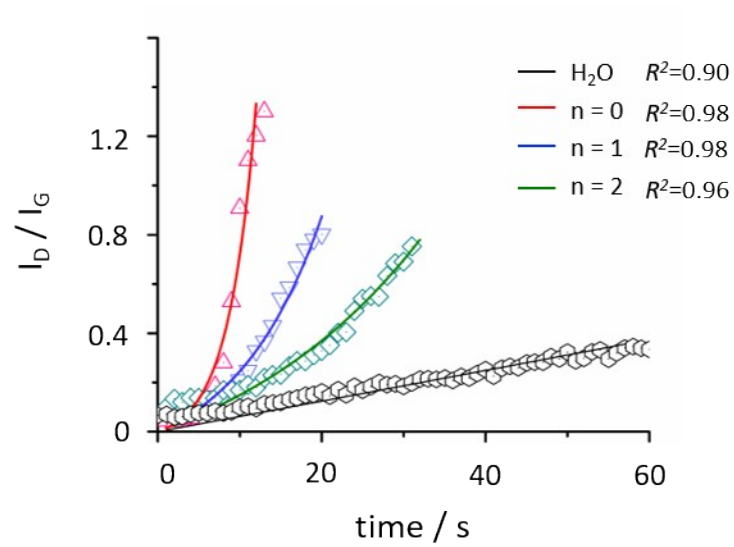

**Fig.S4** Fitting of ID/IG at the initial stage with formula 1 (formic is similar with water),  $R^2$ : residual square

### **Modification at wide area**

PICM at a wide area was conducted using graphene monolayers supported on SiO<sub>2</sub>/Si substrate in 1 M of acetic acid aqueous solution with  $\sim 6 \text{ MW/cm}^2$  by repeating photolithographic mode at  $20 \times 20 \text{ }\mu\text{m}$  as shown in Fig. S4. In detail,  $20 \times 20$  points of  $1 \mu\text{m}$  square area of graphene were modified by automatic movements of the sample stage. Each point of graphene was irradiated with 488 nm laser for 10 s for obtaining over 1 of  $I_D/I_G$  value as shown in the  $I_D/I_G$  map in Fig. S4a. Some darker spots in the optical image are visible, which probably correspond to multilayer graphene as reported by the company (marked with yellow circles in Fig. S4b). Raman information ( $I_{2D}/I_G=0.6$ ) confirms the black spots are multilayer of graphene. As shown in Figure below, the D/G ratio at the darker spot (spot 2) is slightly lower than that at the bright spot (spot 1), indicating that the PICM efficiently at the multilayer is lower resulting in low covalent modifications. This is one of reason of the weaker luminescence in the missing point. In addition to this, luminescence is expected to be significantly quenched on the multi-layers part of the graphene.

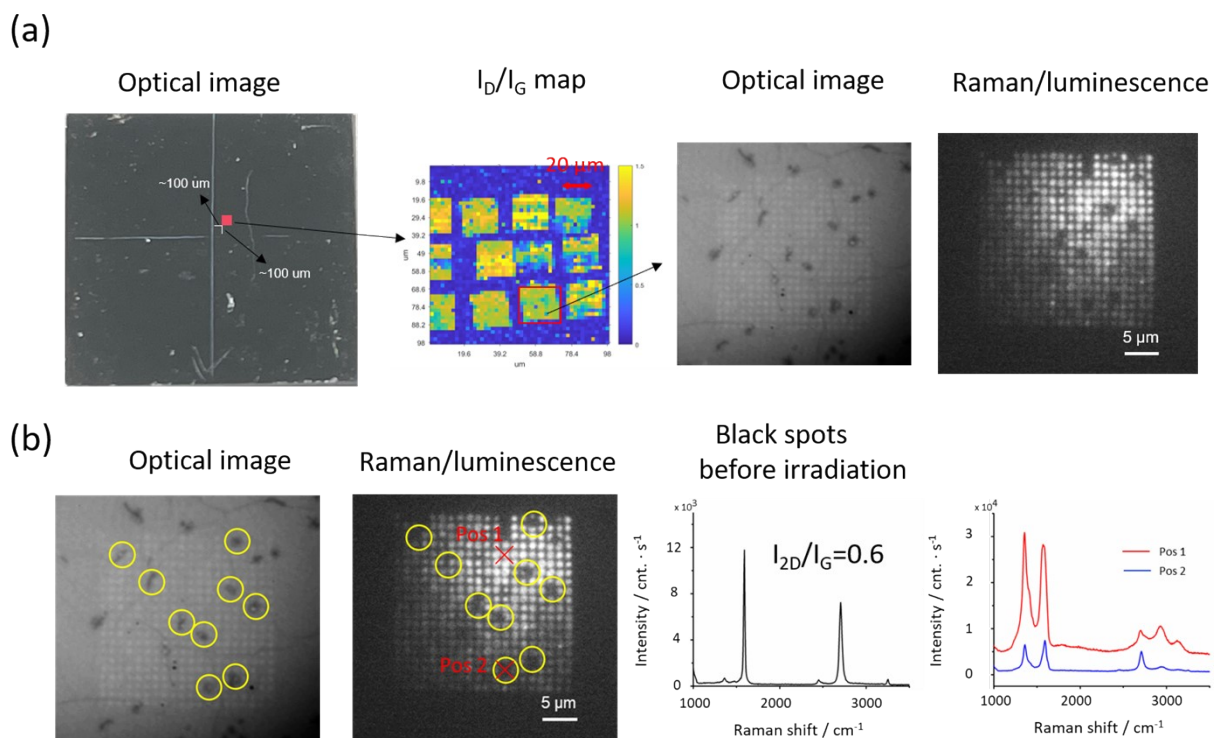

**Fig. S5** (a) Optical and Raman maps of a graphene monolayers modified in an aqueous solution of acetic acid; (b) black spots in optical and Raman/luminescence images and corresponded Raman spectra.

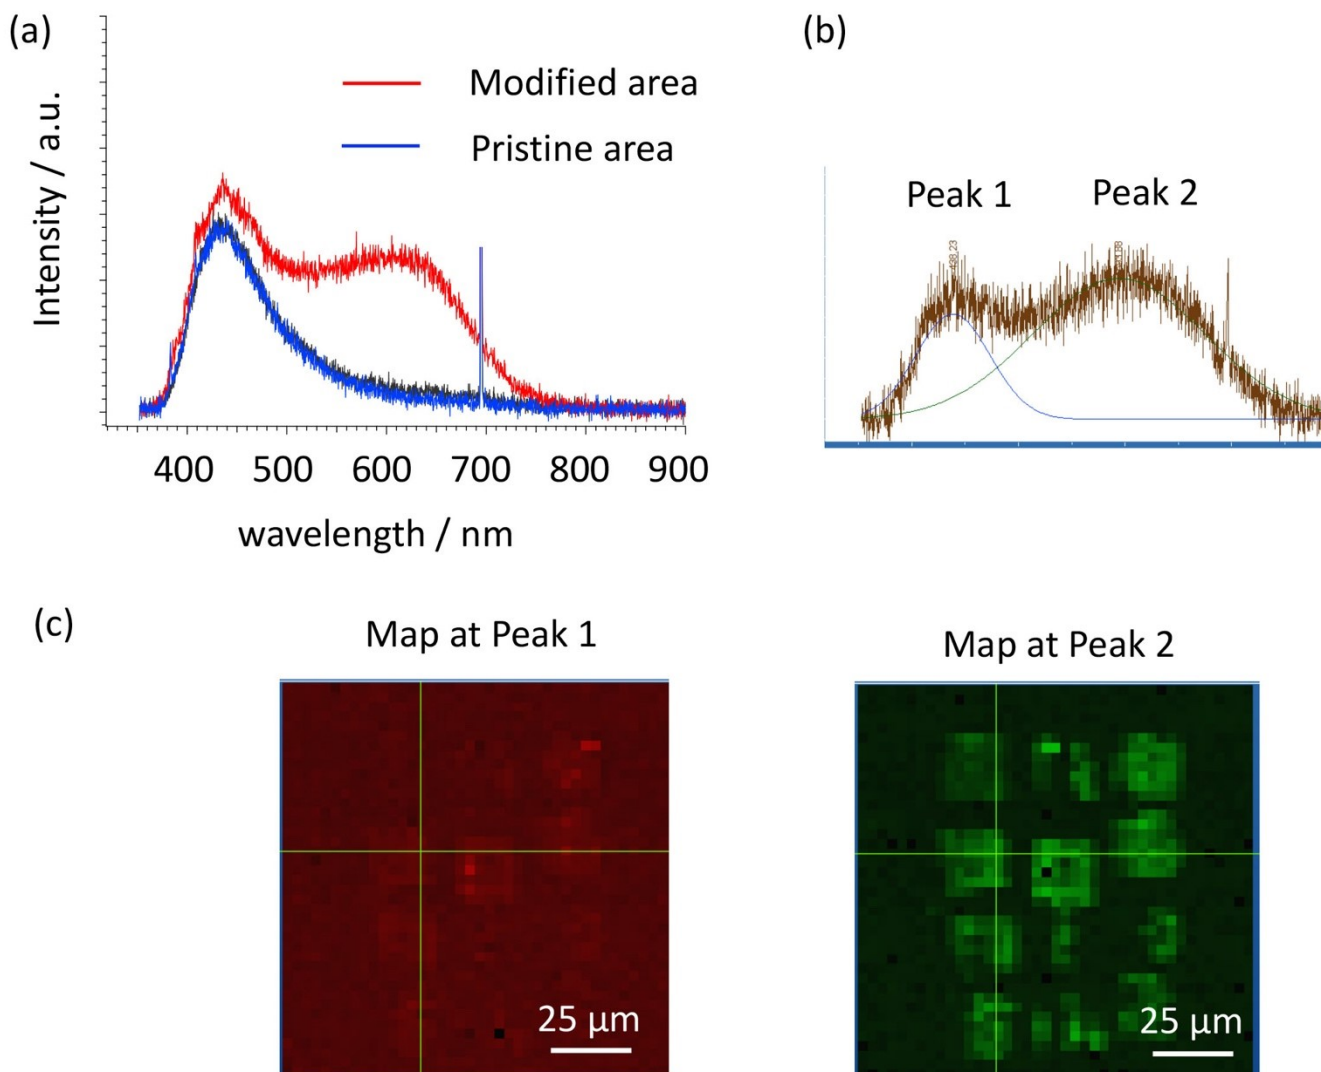

**Fig. S6** Luminescence analysis on the PICM graphene in acetic acid aqueous solution. (a) Averaged luminescence spectra at the modified area (red) and unmodified (pristine) area (blue) of the graphene monolayers. (b) Peak fitting analysis on a luminescence spectrum. The ‘peak 1’ centered at  $\sim 435$  nm is originated from substrate, while the ‘peak 2’ at 620 nm is assigned to the luminescence from the functioned graphene. (c) Luminescence intensity map at the ‘peak 1’ (left) and at the ‘peak 2’ (right).



**Table S1** Summary of wavelength dependence at functioned area of graphene

| Wavelength<br>(nm) | Energy<br>(eV) | D      | G <sup>-</sup> | G      |
|--------------------|----------------|--------|----------------|--------|
| 488                | 2.54           | 1353.9 | 1564.9         | 1596.1 |
| 532                | 2.33           | 1343.9 | 1566.1         | 1594.9 |
| 633                | 1.95           | 1326.5 | 1566.8         | 1593.4 |

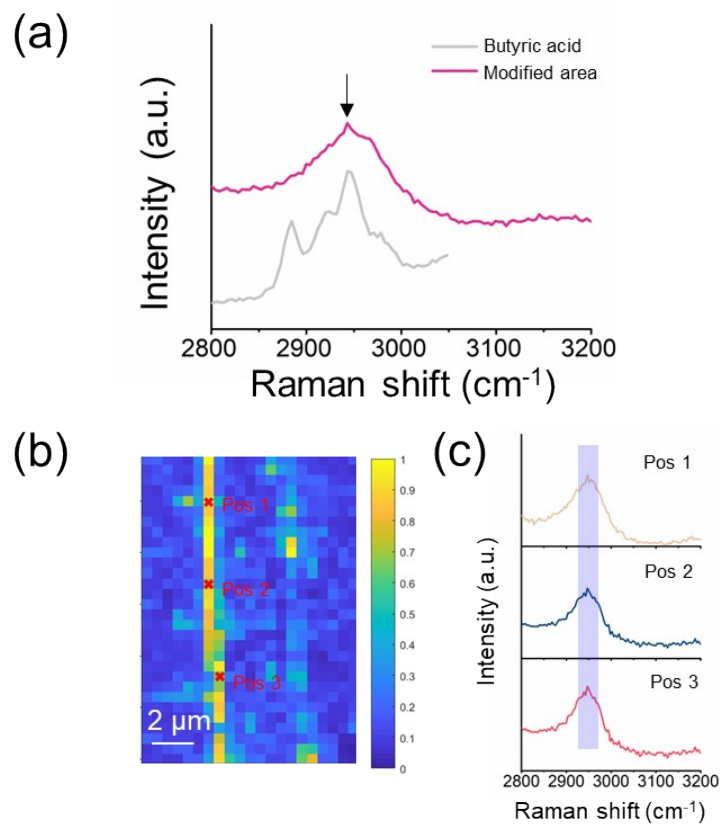

**Fig. S7** (a) Signature of C-H stretching after PICM of graphene in butyric acid; gray line is Raman spectra from the butyric acid solution (highest peak: 2943 cm<sup>-1</sup>); (b) Photo-pattern two lines in butyric acid; and (c) Corresponded Raman spectra on selected points.

## DFT calculations

DFT calculations on alkyl groups covalently attached on graphene were conducted. We assumed that  $-\text{CH}_3$ ,  $-\text{OCH}_3$ ,  $-\text{CH}_2\text{COOH}$  and  $-\text{CH}_2\text{COOCH}_3$  were covalently attached on graphene along with hydroxy group ( $-\text{OH}$ ) or hydrogen atom ( $-\text{H}$ ), respectively. For this simulation, the graphene part was frozen and the vibrational modes of  $-\text{H}/-\text{CH}_3$ ,  $-\text{H}/-\text{OCH}_3$ ,  $-\text{H}/-\text{CH}_2\text{COOH}$ ,  $-\text{H}/-\text{CH}_2\text{COOCH}_3$ ,  $-\text{OH}/-\text{CH}_3$ ,  $-\text{OH}/-\text{OCH}_3$ ,  $-\text{OH}/-\text{CH}_2\text{COOH}$  and  $-\text{OH}/-\text{CH}_2\text{COOCH}_3$  were calculated (Figure S6a). The symmetrical CH stretching can be found at around  $2950\text{ cm}^{-1}$  (Figure S6b and Table S2). All the vibrational modes are displayed in Figure S6. This simulation further supports the assignment of the observed Raman peak at  $2943\text{ cm}^{-1}$  to the alkyl groups from the SCFA.

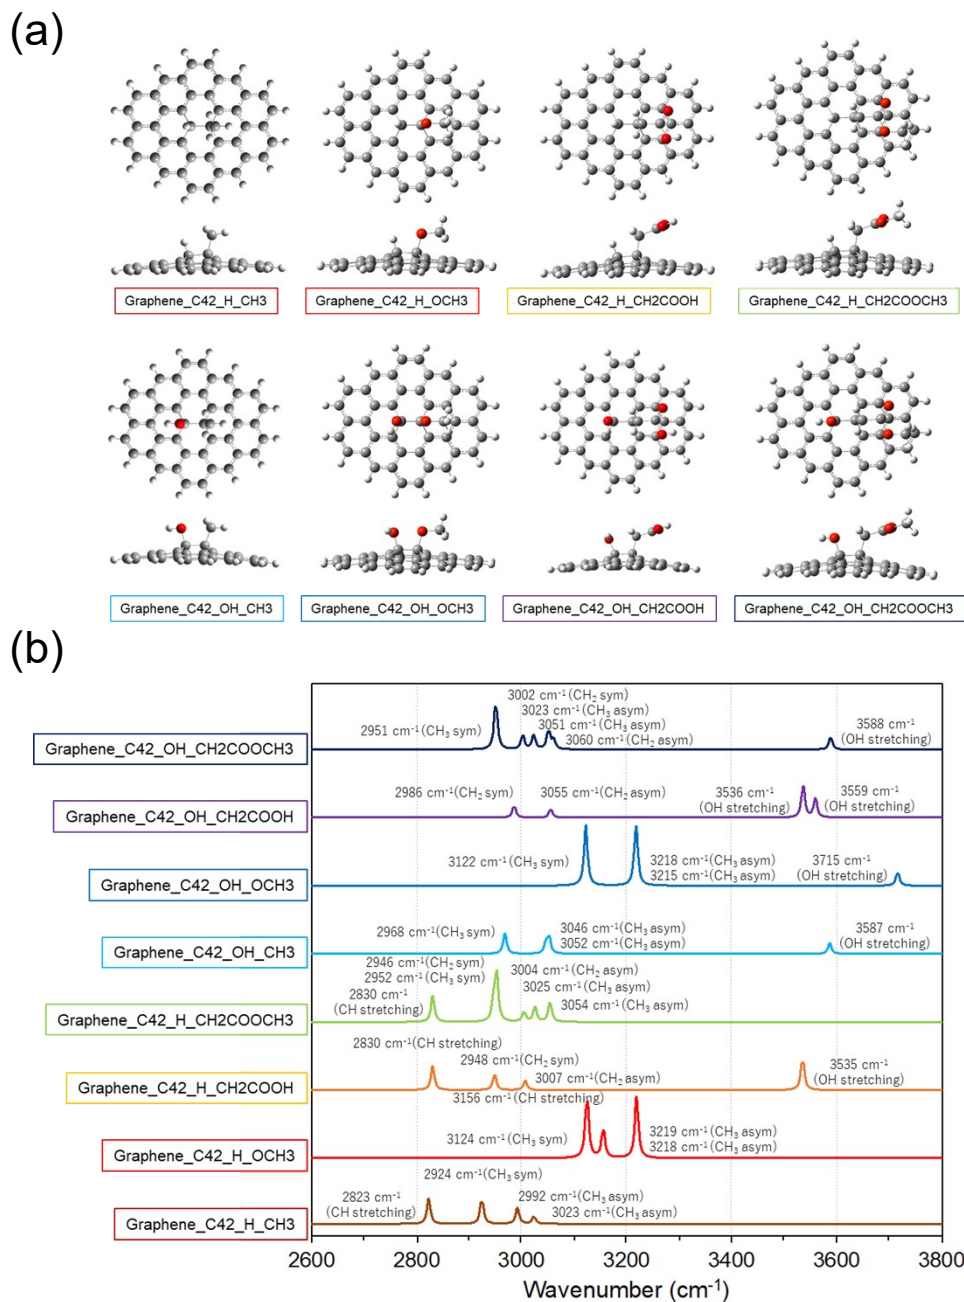

**Fig. S8** DFT calculation in the case of PICM in acetic aqueous solution. (a) Top and side views for the covalent connection of the models; White, gray, and red atoms indicate hydrogen, carbon, and oxygen, respectively. (b) Raman spectra for the eight cases each model (wavenumber scale factor is 0.96).

**Table S2** Raman peaks related to carboxylic acid estimated with DFT calculation

| Possibilities                                       | Peak position (cm <sup>-1</sup> ) | Assignment                                                |
|-----------------------------------------------------|-----------------------------------|-----------------------------------------------------------|
| Graphene / -H / -CH <sub>3</sub>                    | 2823                              | CH stretching                                             |
|                                                     | 2924                              | CH <sub>3</sub> symmetrical stretching                    |
|                                                     | 2992 / 3023                       | CH <sub>3</sub> asymmetrical stretching                   |
|                                                     | 3124                              | CH <sub>3</sub> symmetrical stretching                    |
| Graphene / -H / -OCH <sub>3</sub>                   | 3156                              | CH stretching                                             |
|                                                     | 3219 / 3023                       | CH <sub>3</sub> asymmetrical stretching                   |
|                                                     | 2830                              | CH stretching                                             |
| Graphene /-H / -CH <sub>2</sub> COOH                | 2948                              | CH <sub>2</sub> symmetrical stretching                    |
|                                                     | 3007                              | CH <sub>2</sub> asymmetrical stretching                   |
|                                                     | 3535                              | OH stretching                                             |
|                                                     | 2830                              | CH stretching                                             |
| Graphene /-H / -CH <sub>2</sub> COOCH <sub>3</sub>  | 2946 / 2952                       | CH <sub>2</sub> / CH <sub>3</sub> symmetrical stretching  |
|                                                     | 3004 / 3025 / 3054                | CH <sub>2</sub> / CH <sub>3</sub> asymmetrical stretching |
|                                                     | 2968                              | CH <sub>3</sub> symmetrical stretching                    |
| Graphene / -OH / -CH <sub>3</sub>                   | 3046 / 3052                       | CH <sub>3</sub> asymmetrical stretching                   |
|                                                     | 3587                              | OH stretching                                             |
|                                                     | 3122                              | CH <sub>3</sub> symmetrical stretching                    |
| Graphene / -OH / -OCH <sub>3</sub>                  | 3215 / 3218                       | CH <sub>3</sub> asymmetrical stretching                   |
|                                                     | 3587                              | OH stretching                                             |
|                                                     | 2986                              | CH <sub>2</sub> symmetrical stretching                    |
| Graphene /-OH / -CH <sub>2</sub> COOH               | 3055                              | CH <sub>2</sub> asymmetrical stretching                   |
|                                                     | 3536 / 3559                       | OH stretching                                             |
|                                                     | 2951 / 3002                       | CH <sub>3</sub> / CH <sub>2</sub> symmetrical stretching  |
| Graphene /-OH / -CH <sub>2</sub> COOCH <sub>3</sub> | 3023 / 3051 / 3060                | CH <sub>3</sub> / CH <sub>2</sub> asymmetrical stretching |
|                                                     | 3588                              | OH stretching                                             |
